# Supplementary material
Source: MDPI journal article supplement (https://www.mdpi.com/2073-4395/10/12/1921)
Supplement: s1 [file s1]

**Table S1.** Component of standard nutrient solution.

| Standard A                                            |        | Standard B                                     |        | Standard C                                                                         |        |
|-------------------------------------------------------|--------|------------------------------------------------|--------|------------------------------------------------------------------------------------|--------|
| Chemical reagent                                      | Mass/g | Chemical reagent                               | Mass/g | Chemical reagent                                                                   | Mass/g |
| Ca (NO <sub>3</sub> ) <sub>2</sub> ·4H <sub>2</sub> O | 826    | NH <sub>4</sub> H <sub>2</sub> PO <sub>4</sub> | 115    | EDTA-2Na                                                                           | 27.8   |
| KNO <sub>3</sub>                                      | 607    | MgSO <sub>4</sub> ·7H <sub>2</sub> O           | 483    | FeSO <sub>4</sub> ·7H <sub>2</sub> O                                               | 37.2   |
|                                                       |        |                                                |        | H <sub>3</sub> BO <sub>3</sub>                                                     | 2.86   |
|                                                       |        |                                                |        | MnSO <sub>4</sub> · 4H <sub>2</sub> O                                              | 2.13   |
|                                                       |        |                                                |        | ZnSO <sub>4</sub> ·4H <sub>2</sub> O                                               | 0.22   |
|                                                       |        |                                                |        | CuSO <sub>4</sub> ·5H <sub>2</sub> O                                               | 0.08   |
|                                                       |        |                                                |        | (NH <sub>4</sub> ) <sub>6</sub> Mo <sub>7</sub> O <sub>24</sub> ·4H <sub>2</sub> O | 0.02   |

Note: Each standard liquor was prepared in a 10L aqueous solution. Use after diluting 100 times.

**Table S2.** Grading of cucumber downy mildew severity.

| Disease level | Symptoms described                                             |
|---------------|----------------------------------------------------------------|
| Level 0       | asymptomatic                                                   |
| Level 1       | Diseased spot area occupies less than 5% of the leaf area      |
| Level 3       | Diseased area accounts for 6% to 10% of the leaf area          |
| Level 5       | Diseased area accounts for 11% to 25% of the leaf area         |
| Level 7       | Diseased area accounts for 26% to 50% of the leaf area         |
| Level 9       | Diseased spot area accounts for more than 50% of the leaf area |

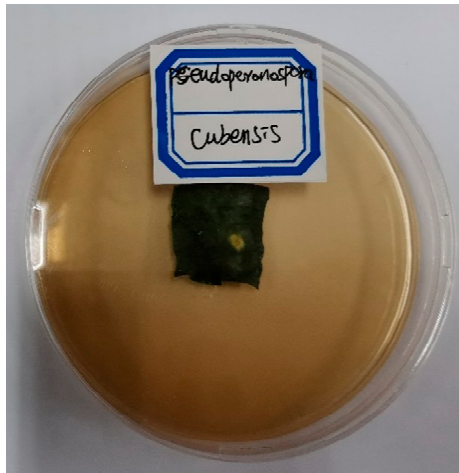**Figure S1.** Extraction of cucumber downy mildew spores
